# Supplementary material for: Paclitaxel plus Bevacizumab versus Paclitaxel Alone for Metastatic Breast Cancer
Source: Atypon-hosted journal article supplement (doi:10.1056/nejmoa072113), 2007-12-26
Supplement: nejm_miller_2666sa1.pdf [file nejm_miller_2666sa1.pdf]

## Supplementary Appendix

This appendix has been provided by the authors to give readers additional information about their work.

Supplement to: Miller K, Wang M, Gralow J, et al. Paclitaxel plus bevacizumab versus paclitaxel alone for metastatic breast cancer. *N Engl J Med* 2007;357:2666-76.

Supplementary Table 1

The reasons for discontinuation of study therapy

|                                          | <b>P+B</b><br><b>(n=347)</b> | <b>P</b><br><b>(n=326)</b> |
|------------------------------------------|------------------------------|----------------------------|
| <i>Treatment completed per protocol*</i> | 17                           | 10                         |
| <i>Disease progression</i>               | 171                          | 180                        |
| <i>Toxicity/complications</i>            | 81                           | 65                         |
| <i>Death</i>                             | 6                            | 4                          |
| <i>Patient withdrawal/refusal</i>        | 25                           | 28                         |
| <i>Alternative therapy</i>               | 8                            | 6                          |
| <i>Other</i>                             | 23                           | 21                         |
| <i>Not specified/missing</i>             | 16                           | 12                         |

*\*E2100 initially limited therapy to a maximum of 18 cycles. A subsequent amendment removed this stipulation and allowed treatment until PD or unacceptable toxicity.*
